# Supplementary material for: Efficient microbial synthesis of key steroidal intermediates from bio-renewable phytosterols by genetically modified Mycobacterium fortuitum strains
Source: Royal Society of Chemistry journal article supplement (doi:10.1039/c9gc01267b), 2019-01-01
Supplement: c9gc01267b1.pdf [file c9gc01267b1.pdf]

## Supplementary Materials for

# Efficient Microbial Synthesis of Key Steroidal Intermediates from Bio-Renewable Phytosterols by Genetically Modified *Mycobacterium fortuitum* Strains

Na Liu<sup>ab1</sup>, Jinhui Feng<sup>a1</sup>, Rui Zhang<sup>a</sup>, Xi Chen<sup>a</sup>, Xuemei Li<sup>a</sup>, Peiyuan Yao<sup>a</sup>, Qiaqing  
Wu<sup>\*a</sup>, Yanhe Ma<sup>a</sup>, Dunming Zhu<sup>\*ab</sup>

<sup>a</sup> National Engineering Laboratory for Industrial Enzymes and Tianjin Engineering  
Research Center of Biocatalytic Technology, Tianjin Institute of Industrial  
Biotechnology, Chinese Academy of Sciences, 32 Xi Qi Dao, Tianjin Airport  
Economic Area, Tianjin 300308, China

<sup>b</sup> University of Chinese Academy of Sciences, Beijing 100049, China

<sup>1</sup> These authors contribute equally to this work.

\* Corresponding author: Dunming Zhu, Email: [zhu\\_dm@tib.cas.cn](mailto:zhu_dm@tib.cas.cn); Qiaqing Wu,  
email: [wu\\_qq@tib.cas.cn](mailto:wu_qq@tib.cas.cn). Phone: 86-22-84861962, Fax: 86-22-84861996

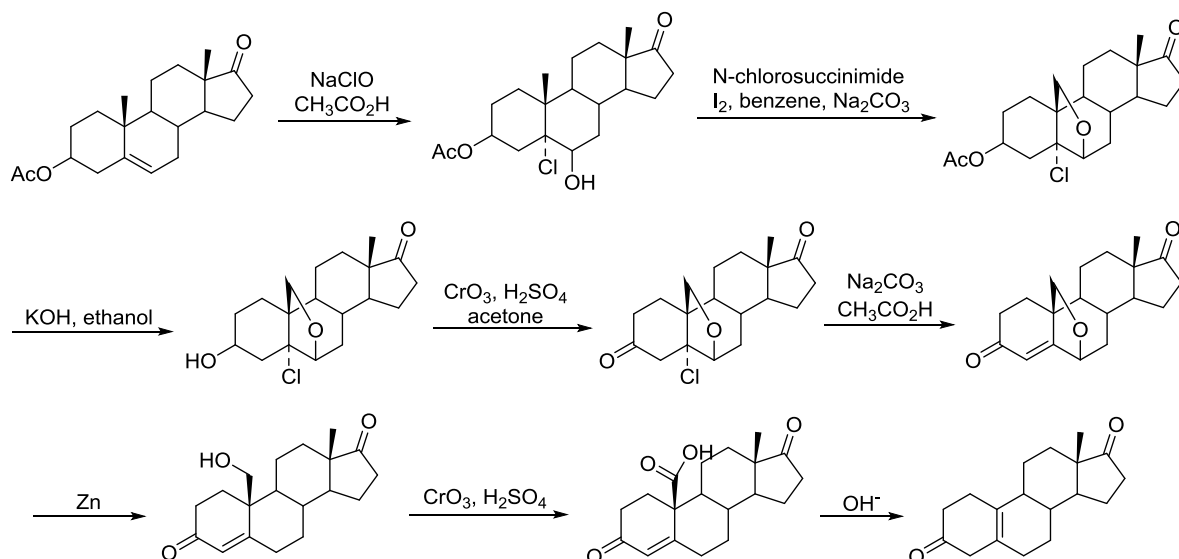

**Scheme S1** The elimination of the C-19 methyl group by chemical synthesis.<sup>1-3</sup>

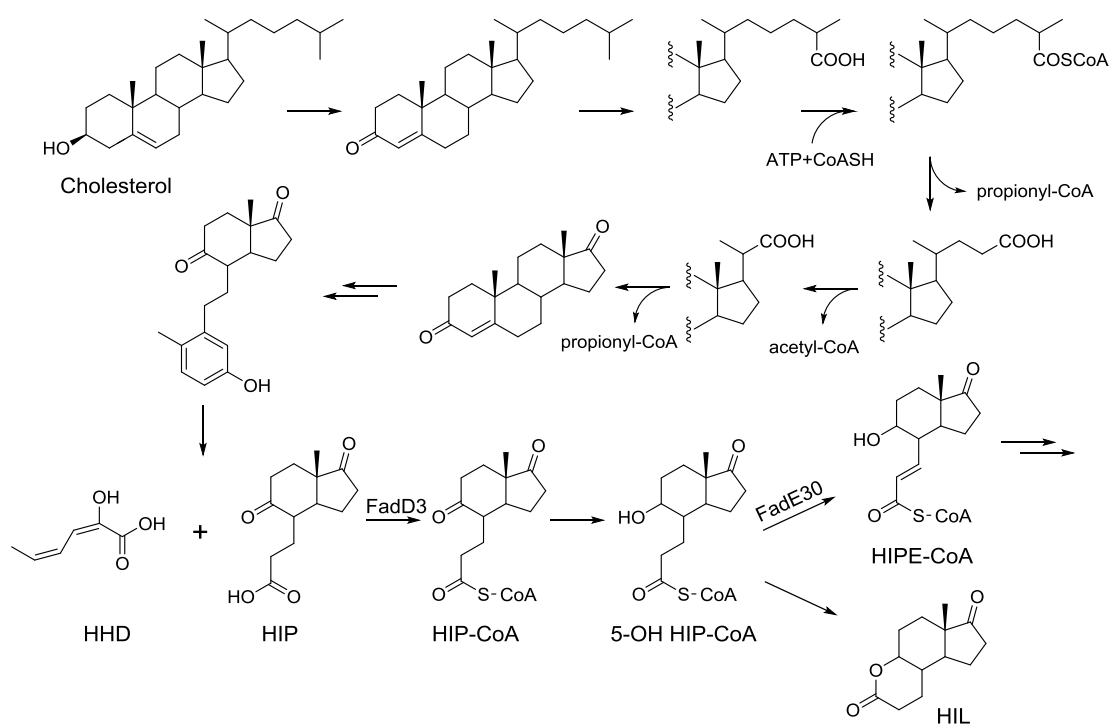

**Scheme S2** Overview of the cholesterol degradation pathway.<sup>4-7</sup> The side chain and AB-ring of cholesterol are degraded to produce HIP and 2-hydroxyhexa-2,4-dienoic acid (HHD). The thioesterification of HIP, which is catalyzed by an acyl-CoA synthase FadD3, initiates the catabolism of CD-ring. FadE30, an acyl-CoA dehydrogenase, catalyzes the further degradation of metabolite 5-OH HIP-CoA.

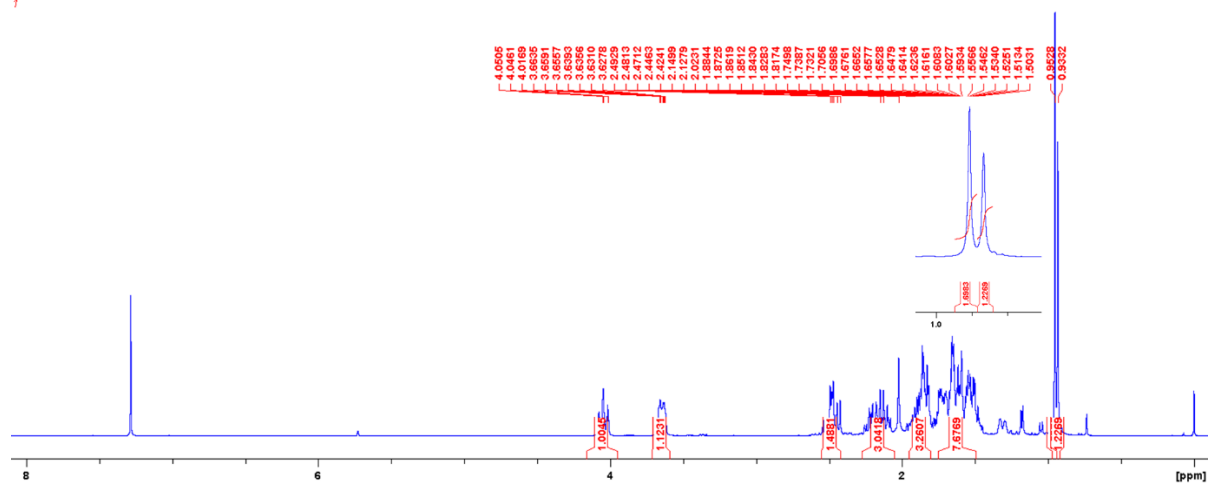

Fig. S1 <sup>1</sup>H NMR spectrum of HIK.

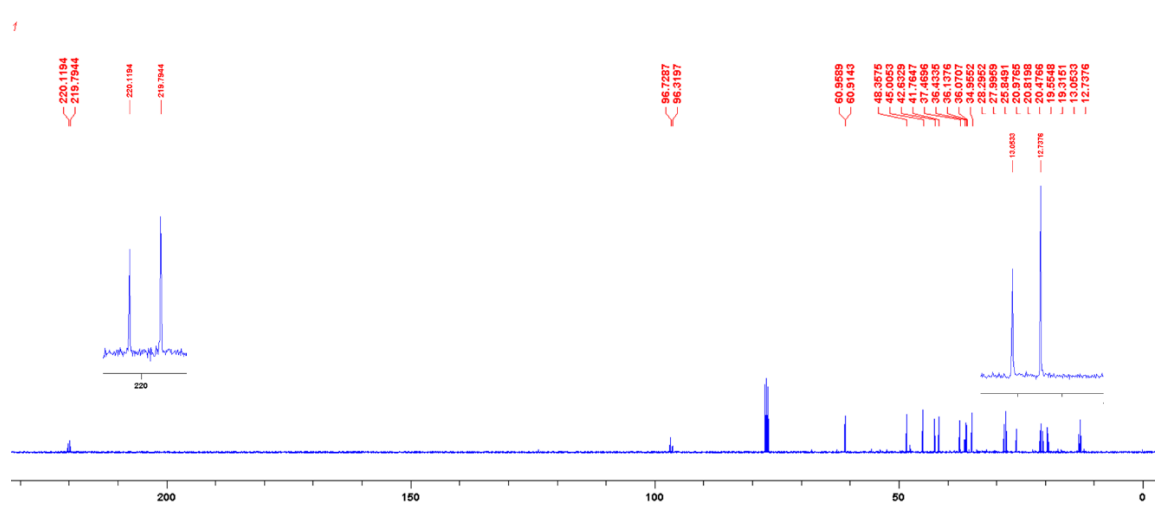

Fig. S2 <sup>13</sup>C NMR spectrum of HIK.

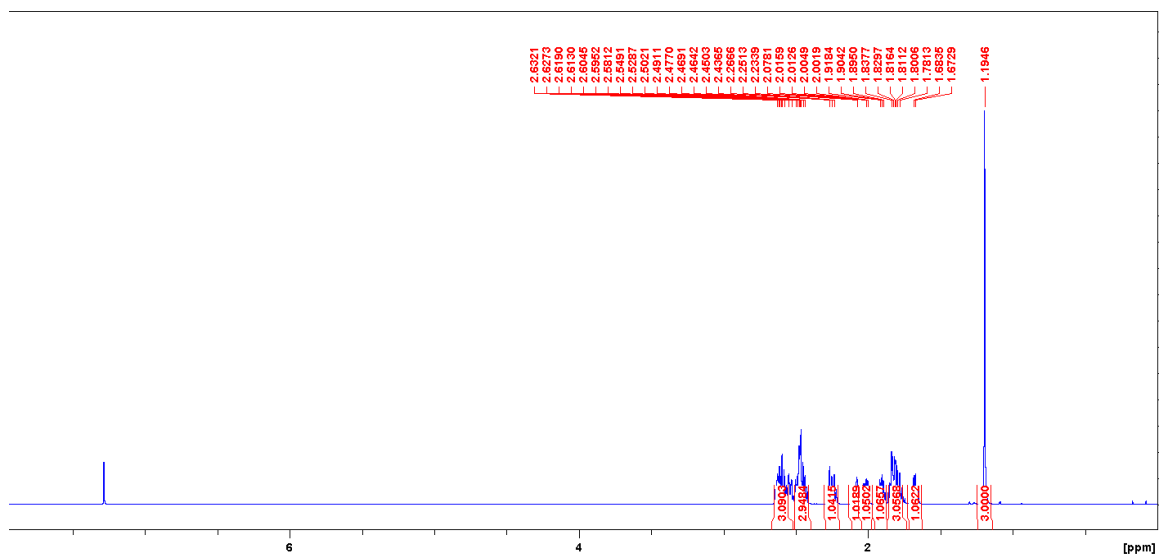

**Fig. S3** <sup>1</sup>H NMR spectrum of HIP.

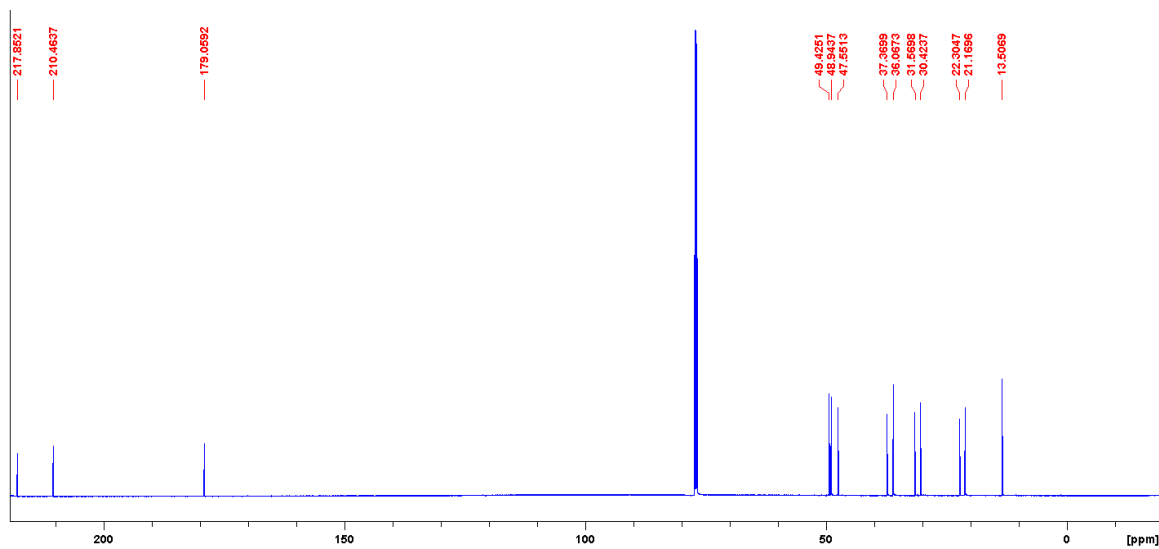

**Fig. S4** <sup>13</sup>C NMR spectrum of HIP.

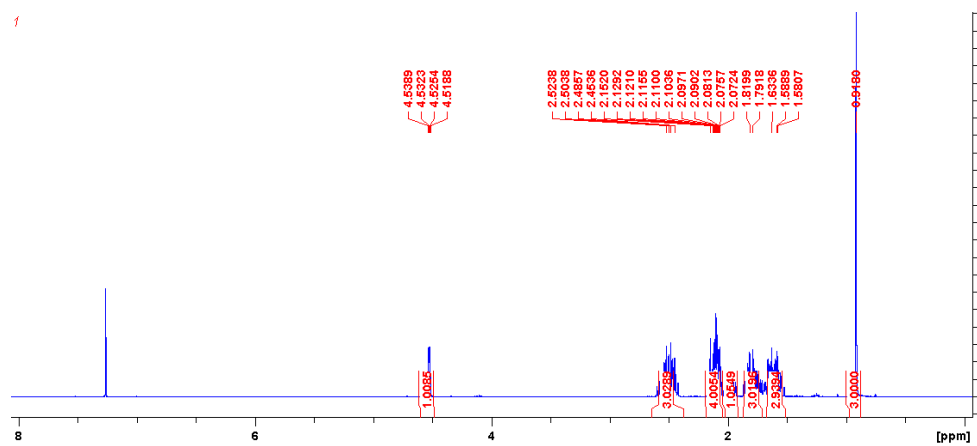

Fig. S5 <sup>1</sup>H NMR spectrum of HIL.

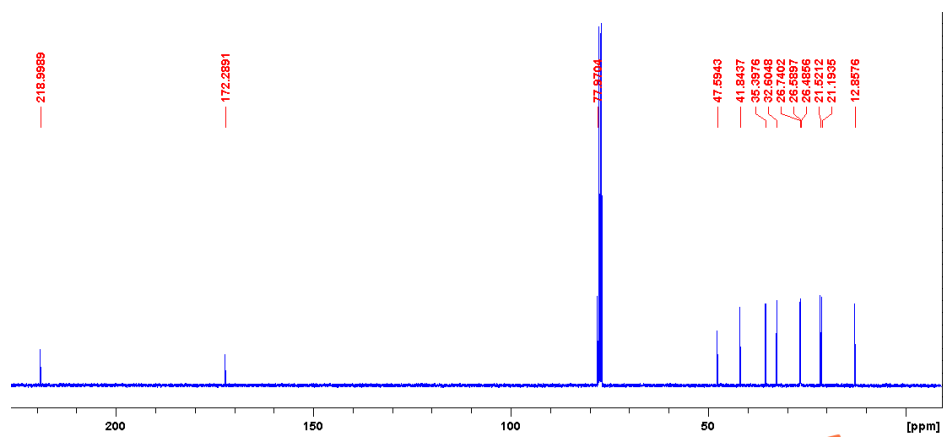

Fig. S6 <sup>13</sup>C NMR spectrum of HIL.

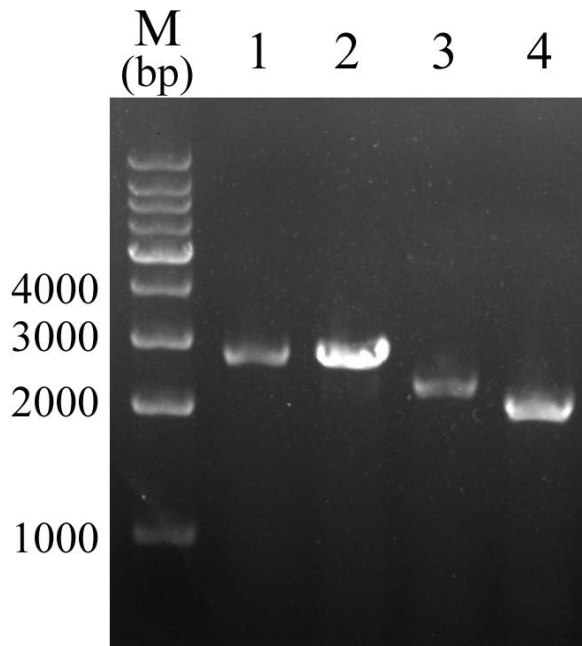

**Fig. S7** Identification of *fadD3* and *fadE30* gene deleted mutants of ATCC 6841 by PCR. Lanes: (M) DNA markers; (1) The PCR products of *fadD3* using ATCC 6841 as the control; (2) The PCR products of *fadE30* using ATCC 6841 as the control; (3) The PCR products of *fadD3* with a shortened size (~ 2300 bp) represented a successful deletion; (4) The PCR products of *fadE30* with a shortened size (~ 1900 bp) represented a successful deletion.

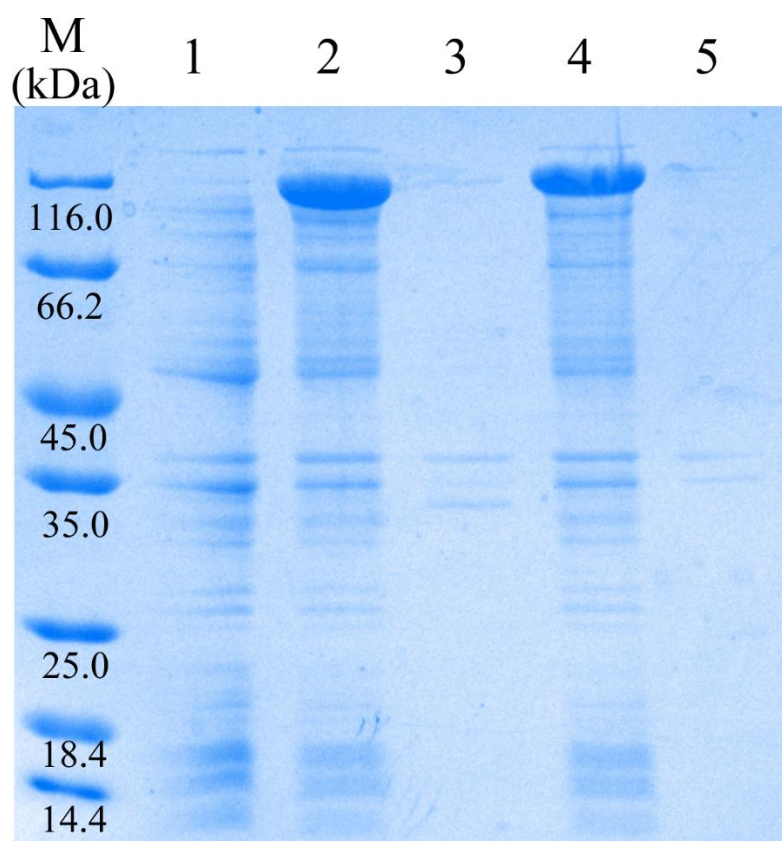

**Fig. S8** SDS-PAGE analysis of heterologous expression of CAR1 and CAR2 from ATCC 6841 in *E. coli* BL21(DE3) host cells. Lanes: (1) total cell extracts of *E. coli* BL21(DE3) harboring blank pET28a(+) as the control; (2) supernatant fraction of CAR1<sub>E. coli</sub>; (3) precipitant fraction of CAR1<sub>E. coli</sub>; (4) supernatant fraction of CAR2<sub>E. coli</sub>; (5) precipitant fraction of CAR2<sub>E. coli</sub>; (M) protein markers.

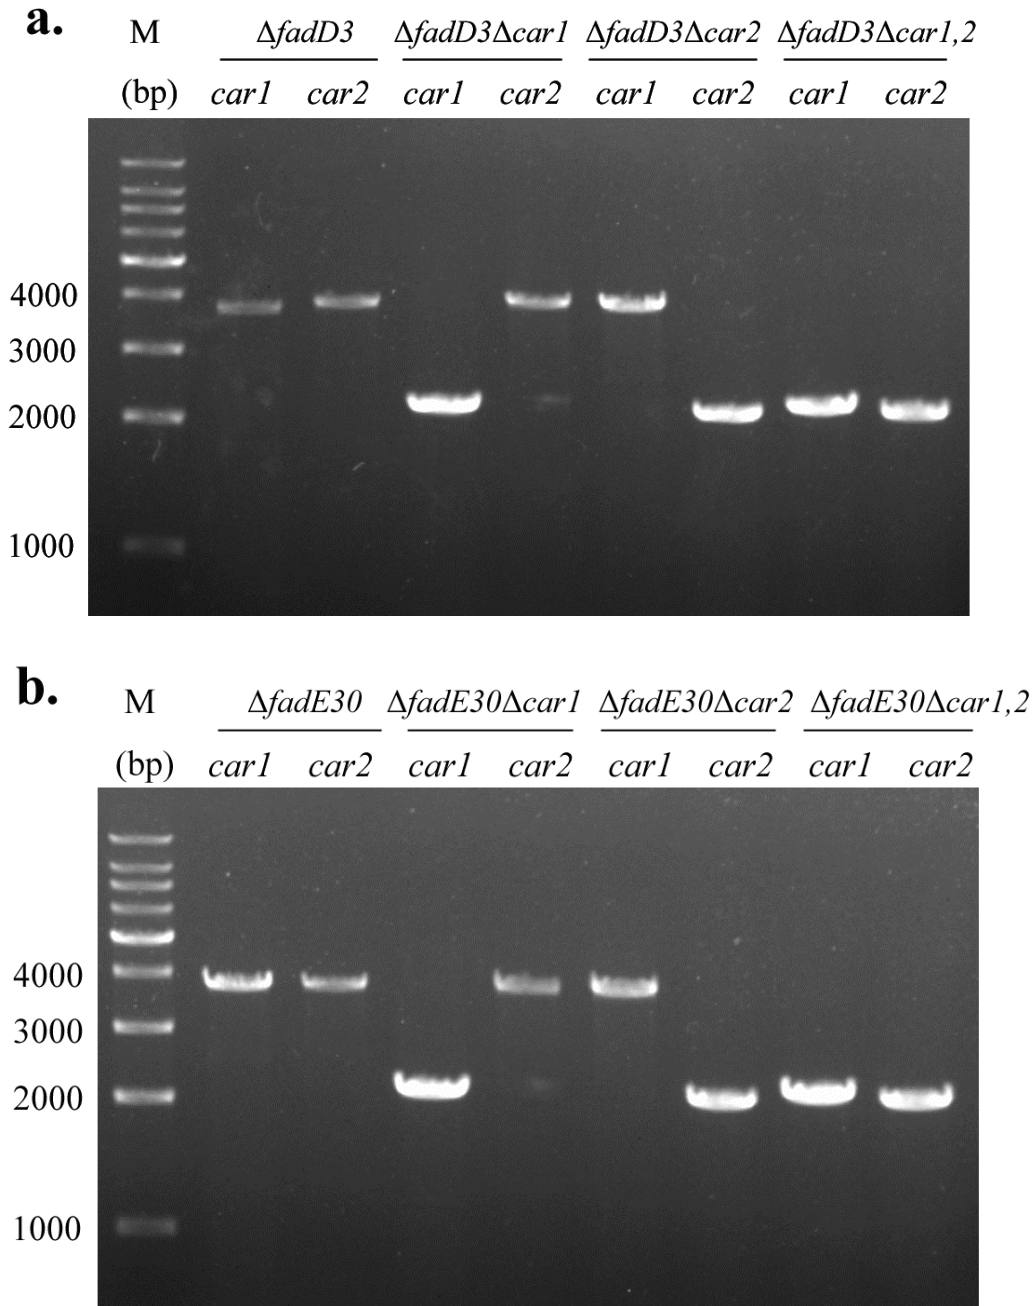

**Fig. S9** Identification of *car1* and *car2* gene deleted strains by PCR. The PCR products of *car1* and *car2* with a shortened size (2100bp and 2000 bp) represented a successful deletion. (a) Identification of *car1* and *car2* deleted strains with  $\Delta$ *fadD3* background. (b) Identification of *car1* and *car2* deleted strains with  $\Delta$ *fadE30* background.



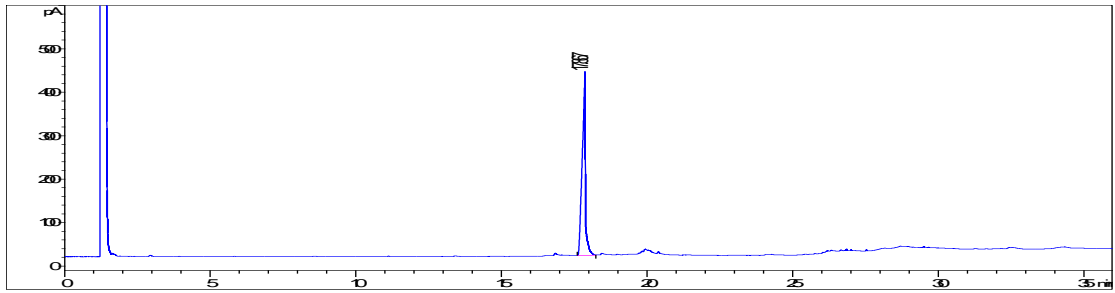

**Fig. S10** The biotransformation of phytosterols by strain  $\Delta fadD3\Delta car1,2$ . The product HIP (17.9 min) was detected from the extract of fermentation supernatant by GC.

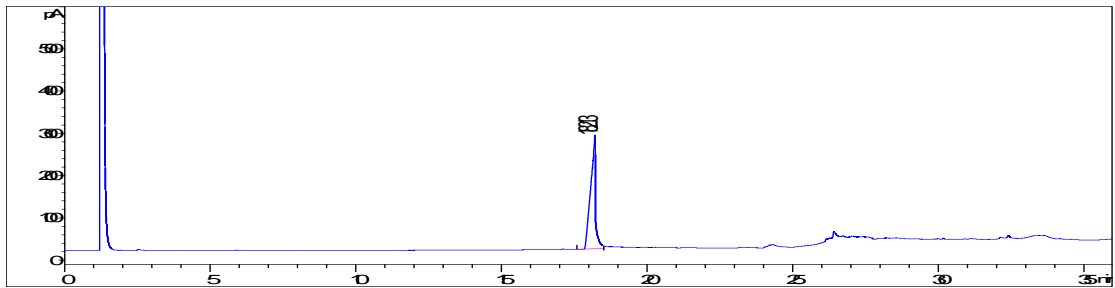

**Fig. S11** The biotransformation of phytosterols by strain  $\Delta fadE30\Delta car1,2$ . The product HIL (18.2 min) was detected from the extract of fermentation supernatant by GC.

**Table S1** Strains used in this study.

| Name                            | Description                                                                 | Source     |
|---------------------------------|-----------------------------------------------------------------------------|------------|
| ATCC 6841                       | Wild type strain                                                            | ATCC       |
| $\Delta fadD3$                  | <i>fadD3</i> -deleted strain of 6841                                        | This study |
| $\Delta fadD3\Delta car1$       | <i>car1</i> -deleted strain with $\Delta fadD3$ background                  | This study |
| $\Delta fadD3\Delta car2$       | <i>car2</i> -deleted strain with $\Delta fadD3$ background                  | This study |
| $\Delta fadD3\Delta car1,2$     | <i>car1</i> and <i>car2</i> -deleted strain with $\Delta fadD3$ background  | This study |
| $\Delta fadE30$                 | <i>fadE30</i> -deleted strain of 6841                                       | This study |
| $\Delta fadE30\Delta car1$      | <i>car1</i> -deleted strain with $\Delta fadE30$ background                 | This study |
| $\Delta fadE30\Delta car2$      | <i>car2</i> -deleted strain with $\Delta fadE30$ background                 | This study |
| $\Delta fadE30\Delta car1,2$    | <i>car1</i> and <i>car2</i> -deleted strain with $\Delta fadE30$ background | This study |
| pET28a <sub><i>E.coli</i></sub> | <i>E.coli</i> BL21(DE3) harboring pET28a(+)                                 | Novagen    |
| CAR1 <sub><i>E.coli</i></sub>   | <i>E.coli</i> BL21(DE3) harboring pET28a(+)- <i>car1</i>                    | This study |
| CAR2 <sub><i>E.coli</i></sub>   | <i>E.coli</i> BL21(DE3) harboring pET28a(+)- <i>car2</i>                    | This study |

**Table S2** Primers and plasmids used in this study.

| Name                              | Description                                        | Source/reference |
|-----------------------------------|----------------------------------------------------|------------------|
| <b>Primers</b>                    |                                                    |                  |
| <i>fadE30</i> <sub>del</sub> -U-F | <u>TGTTGCCATTGCTGCAGGCACCGGGTACAGAGTCG</u>         | This study       |
| <i>fadE30</i> <sub>del</sub> -U-R | TGATTCCACGCCCGACGCTCTTC                            | This study       |
| <i>fadE30</i> <sub>del</sub> -D-F | <u>CGTCGGGCGTGGAATCACCGCTGATCCGCCAAAAG</u>         | This study       |
| <i>fadE30</i> <sub>del</sub> -D-R | <u>GTACCGCGGCCGCTTAATTAAGCCGAACGCCTCGTCTGA</u>     | This study       |
| <i>fadD3</i> <sub>del</sub> -U-F  | <u>ACGTTGTTGCCATTGCTGCAGCGGTGACGTCGAGGATCTTG</u>   | This study       |
| <i>fadD3</i> <sub>del</sub> -U-R  | <u>GGTAGCCGAGCATGACATTGGGTTGATGCACAGATAGCGGTCG</u> | This study       |
| <i>fadD3</i> <sub>del</sub> -D-F  | <u>CGACCGCTATCTGTGCATCAACCCAATGTCATGCTCGGCTACC</u> | This study       |
| <i>fadD3</i> <sub>del</sub> -D-R  | <u>GTACCGCGGCCGCTTAATTAACTCGTTGCTCGACGTGCTCATG</u> | This study       |
| <i>car1</i> <sub>del</sub> -U-F   | <u>TGTTGCCATTGCTGCAGGCATCTCGCACCATCAGC</u>         | This study       |

| Name                            | Description                                    | Source/reference |
|---------------------------------|------------------------------------------------|------------------|
| <i>car1</i> <sub>del</sub> -U-R | <u>AGGTC</u> ACTTGGTCGAGCCAGCGCCGCCTGATTCTC    | This study       |
| <i>car1</i> <sub>del</sub> -D-F | CAGCGCCGCCTGATTCTCGCTCGACCAAGTGACCTG           | This study       |
| <i>car1</i> <sub>del</sub> -D-R | <u>CGCGGCCGCTTAATTA</u> ACGATCGGCTTGCTCTAGG    | This study       |
| <i>car2</i> <sub>del</sub> -U-F | <u>TGTTGCCATTGCTGC</u> AGGATCAGACTCACAGCACATTG | This study       |
| <i>car2</i> <sub>del</sub> -U-R | GATCTTCGTGGTGAGCGCGGCGAGCGAGGCATACAG           | This study       |
| <i>car2</i> <sub>del</sub> -D-F | <u>CTGTATGCCTCGCTCGCC</u> GCGCTCACCACGAAGATC   | This study       |
| <i>car2</i> <sub>del</sub> -D-R | <u>CGCGGCCGCTTAATTA</u> AAGGTTCCCCTGAGCAAATC   | This study       |
| <i>car1</i> -F                  | <u>CGCGGCAGCCATATG</u> ACCACCGAAACGC           | This study       |
| <i>car1</i> -R                  | GAGCTCGAATTCGGATCCTTACAGCAATCCGAGCAG           | This study       |
| <i>car2</i> -F                  | <u>CGCGGCAGCCATATG</u> TCGTTTGATACTCGC         | This study       |
| <i>car2</i> -R                  | GAGCTCGAATTCGGATCCTAGAGCAGGCCGAGCTG            | This study       |

| Name                               | Description                                                                                                              | Source/reference               |
|------------------------------------|--------------------------------------------------------------------------------------------------------------------------|--------------------------------|
| <b>Plasmids</b>                    |                                                                                                                          |                                |
| p2NIL                              | Gene manipulation vector, Kan <sup>R</sup>                                                                               | Parish and Stoker <sup>8</sup> |
| pGOAL19                            | <i>Hyg</i> <i>Pag85-lacZ</i> <i>P<sub>hsp60</sub>-sacB</i> , <i>PacI</i> cassette vector, Amp <sup>R</sup>               | Parish and Stoker <sup>8</sup> |
| pET28a(+)                          | <i>E. coli</i> expression vector, Kan <sup>R</sup>                                                                       | Novagen                        |
| pKH <sub>del</sub> - <i>fadE30</i> | p2NIL carrying the alleles of <i>fadE30</i> and the selection cassette from pGOAL19, Kan <sup>R</sup> , Hyg <sup>R</sup> | This study                     |
| pKH <sub>del</sub> - <i>fadD3</i>  | p2NIL carrying the alleles of <i>fadD3</i> and the selection cassette from pGOAL19, Kan <sup>R</sup> , Hyg <sup>R</sup>  | This study                     |
| pKH <sub>del</sub> - <i>car1</i>   | p2NIL carrying the alleles of <i>car1</i> and the selection cassette from pGOAL19, Kan <sup>R</sup> , Hyg <sup>R</sup>   | This study                     |
| pKH <sub>del</sub> - <i>car2</i>   | p2NIL carrying the alleles of <i>car2</i> and the selection cassette from pGOAL19, Kan <sup>R</sup> , Hyg <sup>R</sup>   | This study                     |
| pET28a(+)- <i>car1</i>             | pET-28a(+) harboring the <i>car1</i> gene, Kan <sup>R</sup>                                                              | This study                     |
| pET28a(+)- <i>car2</i>             | pET-28a(+) harboring the <i>car2</i> gene, Kan <sup>R</sup>                                                              | This study                     |

Notes: Kan<sup>R</sup> kanamycin-resistant, Amp<sup>R</sup> ampicillin-resistant, Hyg<sup>R</sup> hygromycin-resistant, the restriction enzyme cutting sites were in bold, and the homologous sequence were underlined.

## References

1. K. Heusler, J. Kalvoda, in *Organic Reactions in Steroid Chemistry*, ed. J. Fried, J. A. Edwards, Van Nostrand Reinhold Company, New York, 1972, II, 237-287.
2. T. B. Windholz, M. Windholz, *Angew. Chem. Int. Ed.*, 1964, **3**, 353-361.
3. Y. Wang, W. Ju, H. L. Tian, W. S. Tian, and J. H. Gui, *J. Am. Chem. Soc.*, 2018, **140**, 9413-9416.
4. I. Casabon, A. M. Crowe, J. Liu, L. D. Eltis, *Mol. Microbiol.*, 2013, **87**, 269-283.
5. R. van der Geize, A. W. F. Grommen, G. I. Hessels, A. A. C. Jacobs, L. Dijkhuizen, *PloS Pathog.*, 2011, **7**, e1002181.
6. R. Van der Geize, K. Yam, T. Heuser, M. H. Wilbrink, H. Hara, M. C. Anderton, E. Sim, L. Dijkhuizen, J. E. Davies, W. W. Mohn, L. D. Eltis, *Proc. Natl. Acad. Sci. U. S. A.*, 2007, **104**, 1947-1952.
7. S. T. Thomas, B. C. VanderVen, D. R. Sherman, D. G. Russell, N. S. Sampson, *J. Biol. Chem.*, 2011, **286**, 43668-43678.
8. T. Parish, N. G. Stoker, *Microbiology*, 2000, **146**, 1969-1975.
